# Supplementary material for: Towards a Robust Hydrologic Data Assimilation System for Hurricane-induced River Flow Forecasting
Source: Copernicus journal article supplement (doi:10.5194/hess-2024-209), 2024-10-21
Supplement: Supplementary file 1 [file hess-2024-209-supplement-version2.pdf]

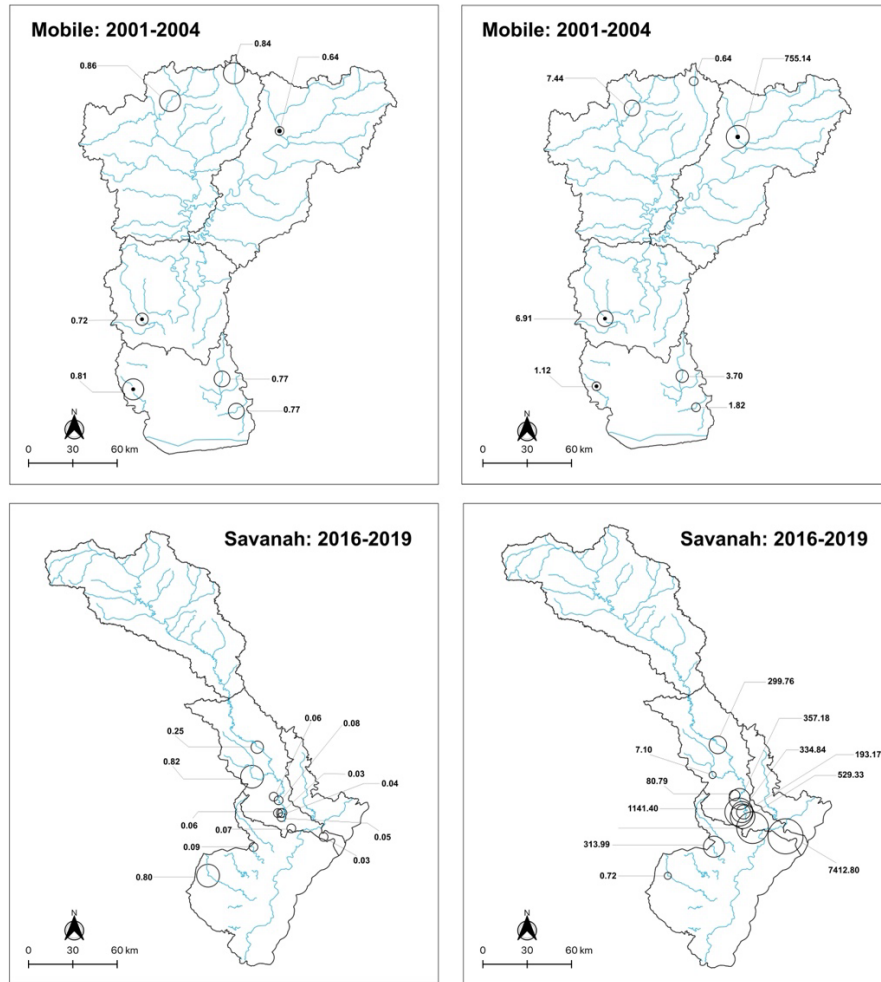

Figure S1. SAC-SMA model performance over the validation period across the USGS stations within the Mobile and Savannah watersheds. Left panel: R. Right panel: RMSE.

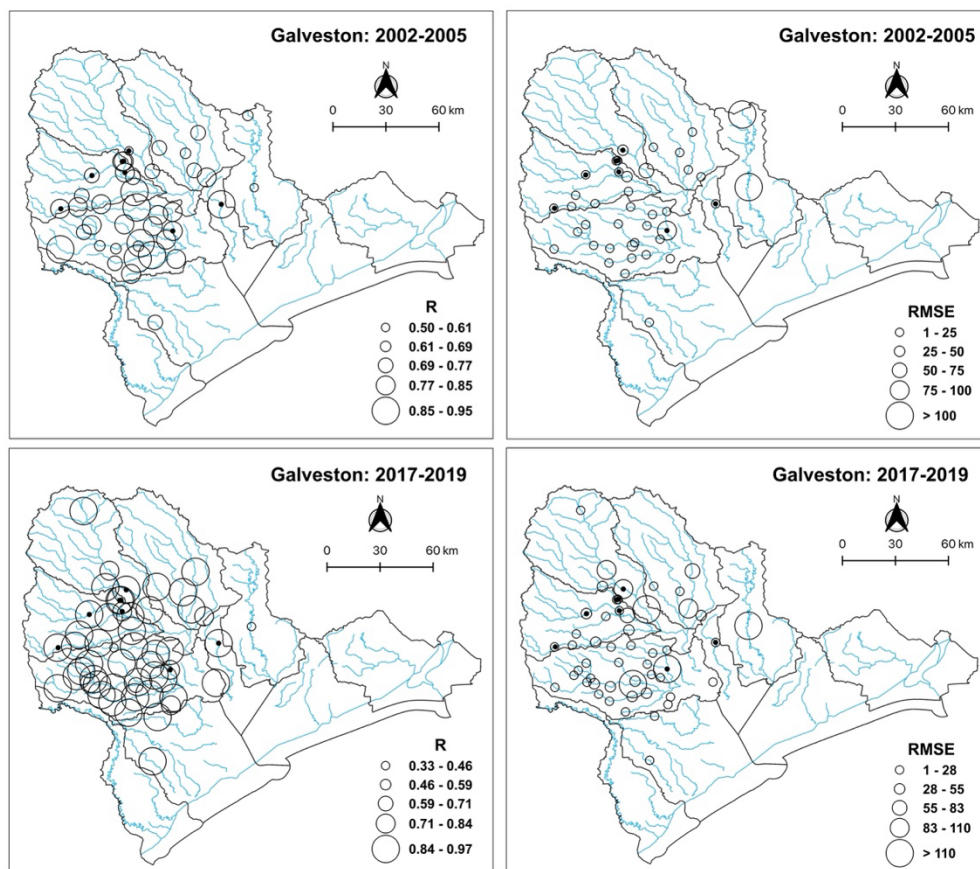

Figure S2. SAC-SMA model performance after data assimilation across the USGS stations within the Galveston watershed.

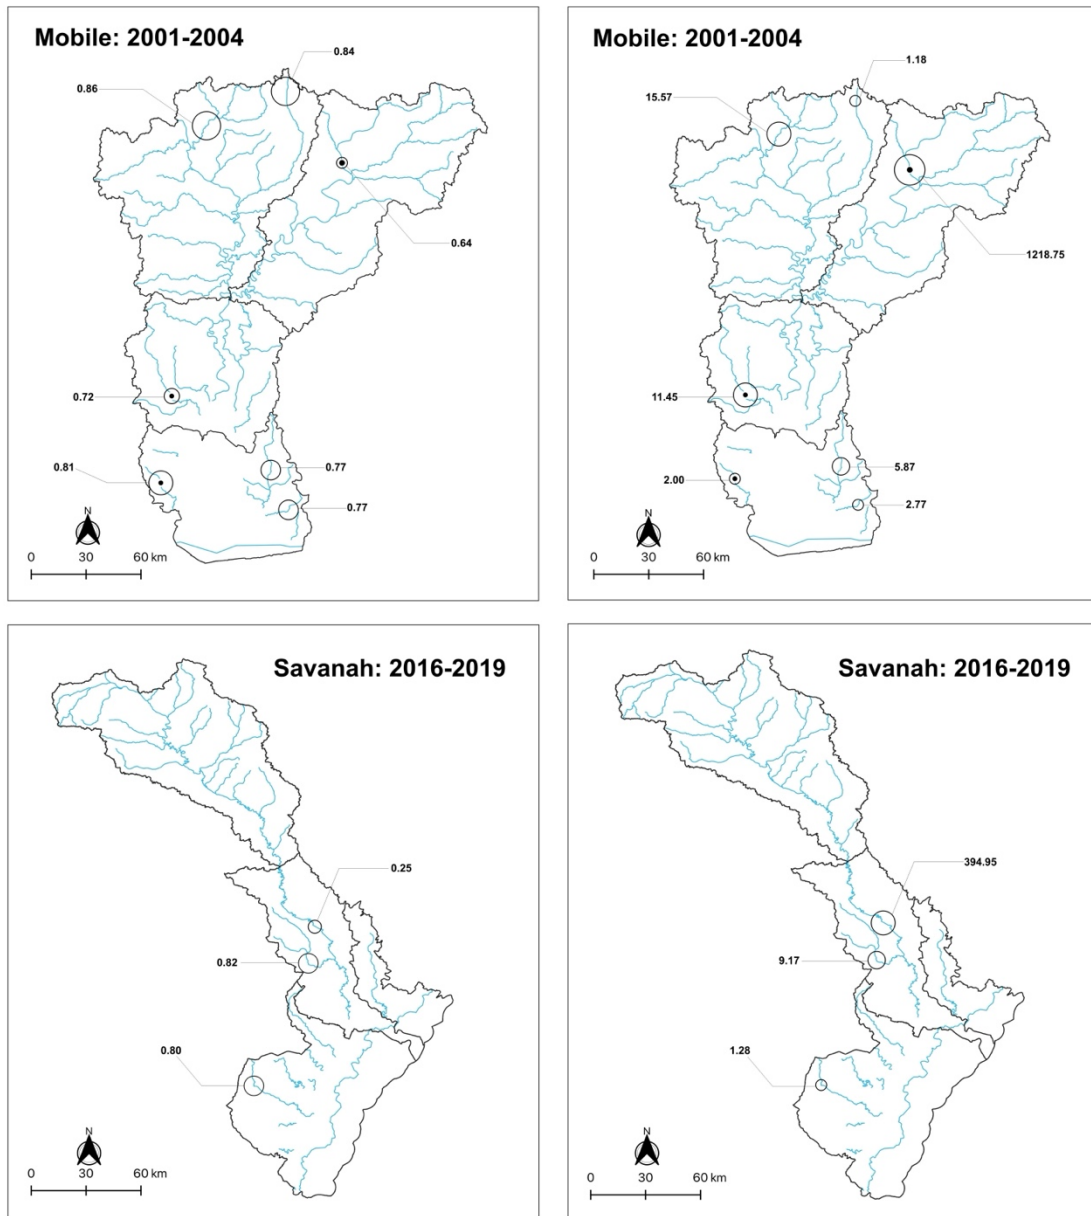

Figure S3. SAC-SMA model performance after data assimilation across the USGS stations within the Mobile and Savannah watersheds. Left panel: R. Right panel: RMSE.
