# Supplementary figures and images for: Towards a Robust Hydrologic Data Assimilation System for Hurricane-induced River Flow Forecasting
Source: Copernicus journal article supplement (doi:10.5194/hess-2024-209), 2024-10-21

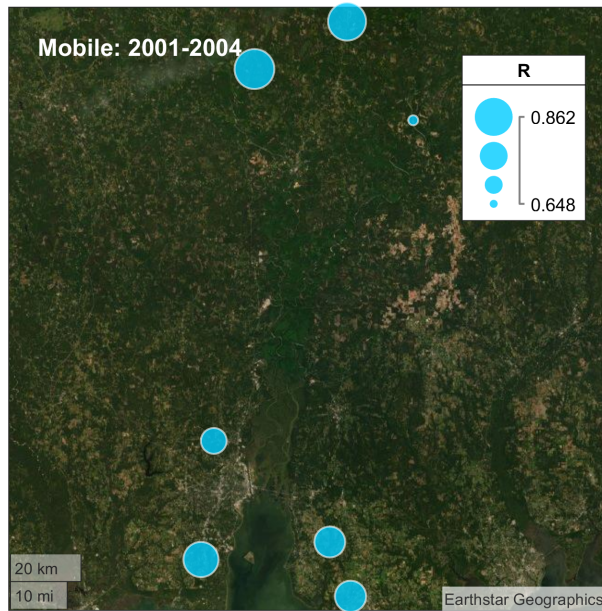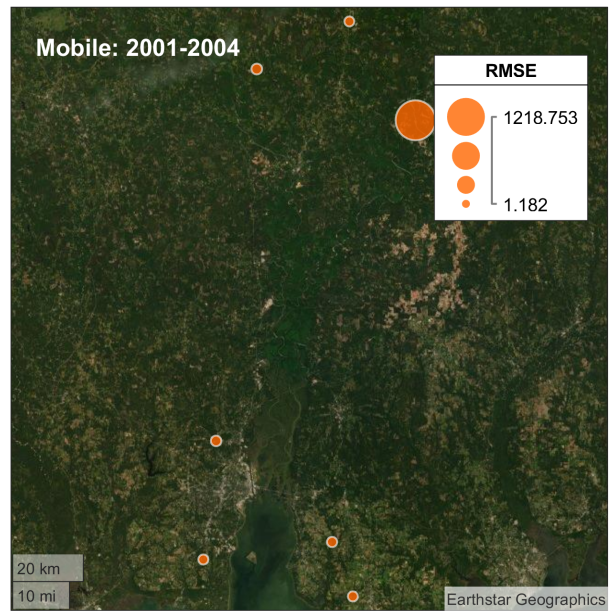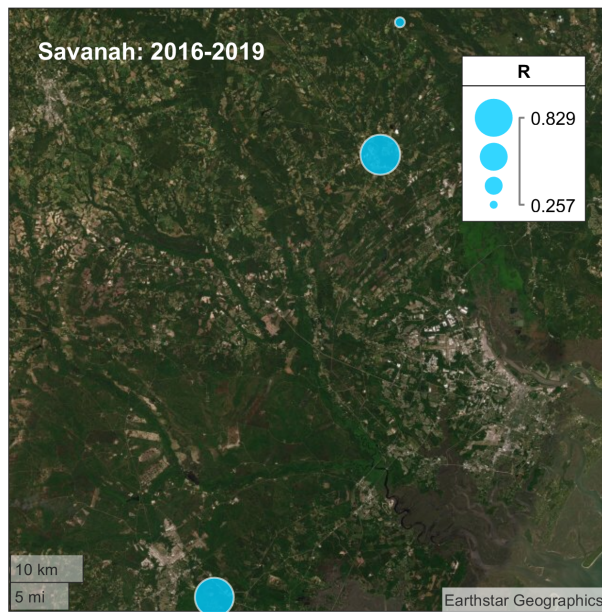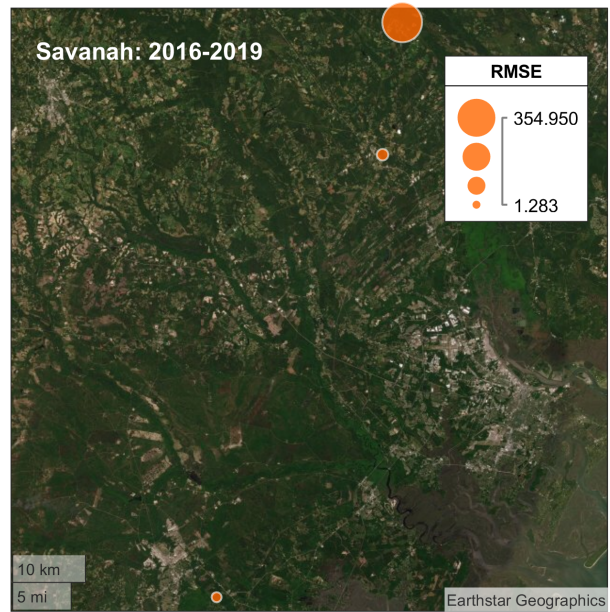

Figure 1S.



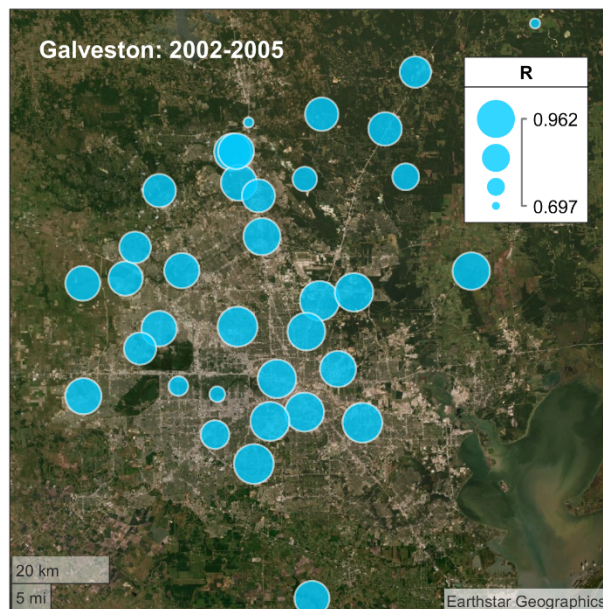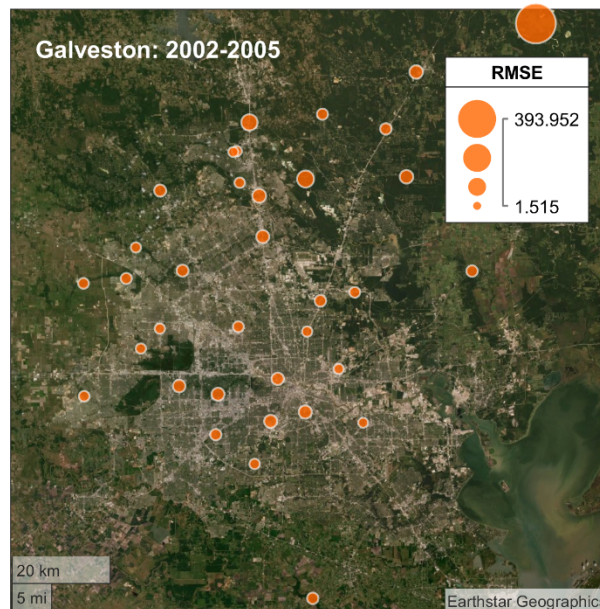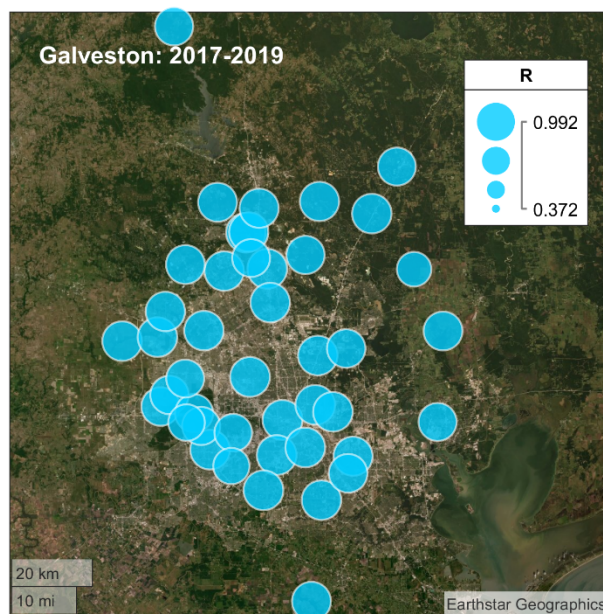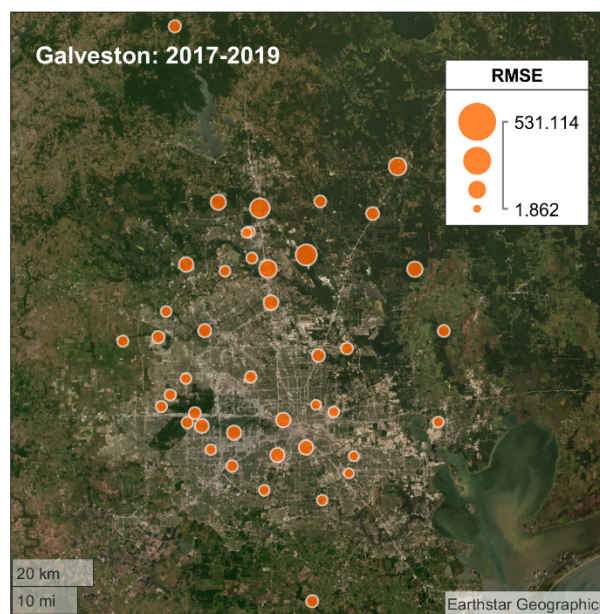

**Figure 2S.**



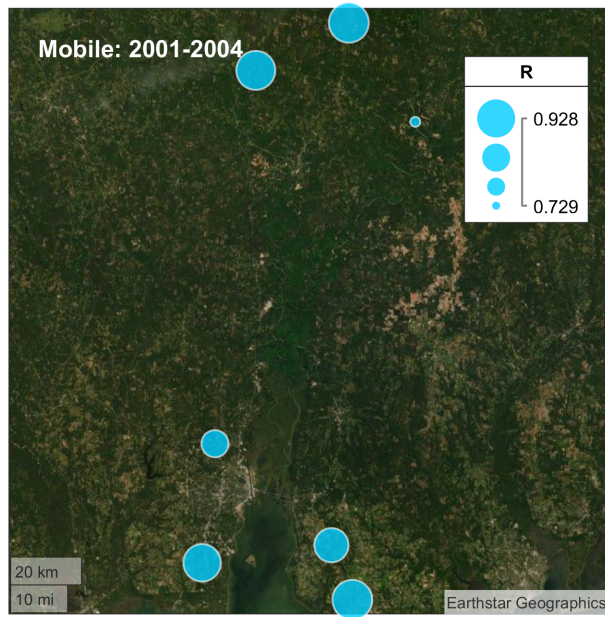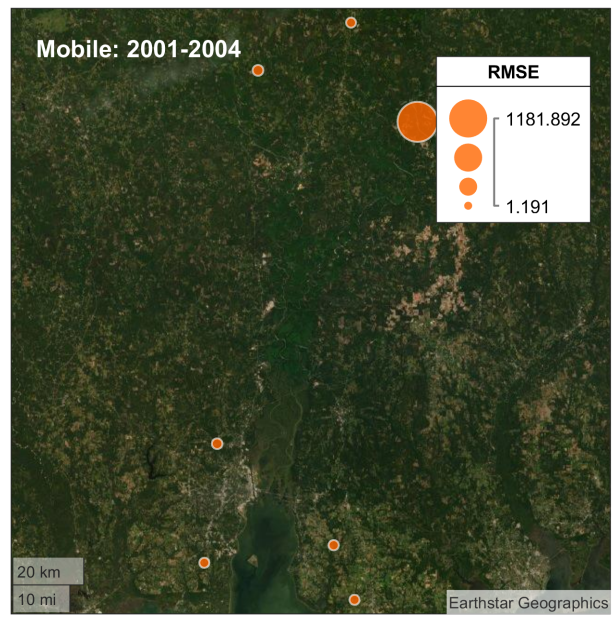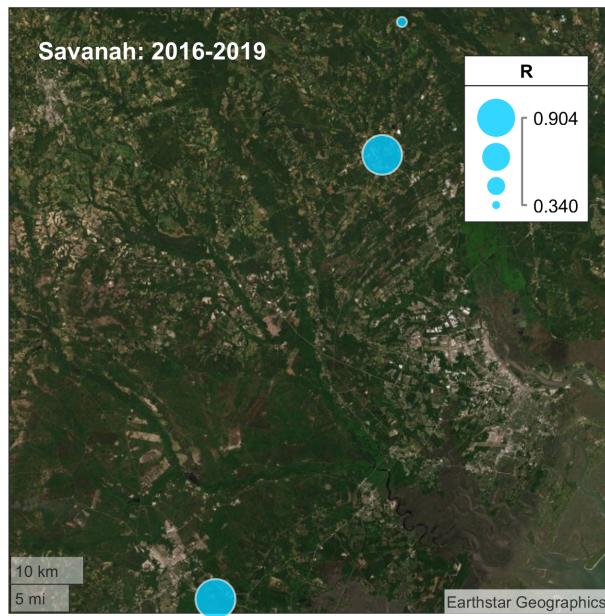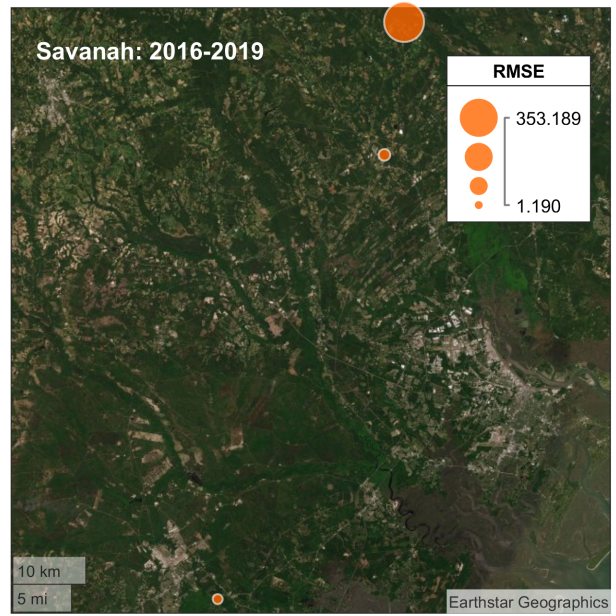

**Figure 3S.**

Supplement: Supplementary file 2 [file hess-2024-209-supplement.pdf]
